# Supplementary material
Source: PubMed Central journal article supplement (PMC6391202)

# A. Driver genes ( $p < 0.10$ ) in validated gene sets in estrogen receptor positive tumors

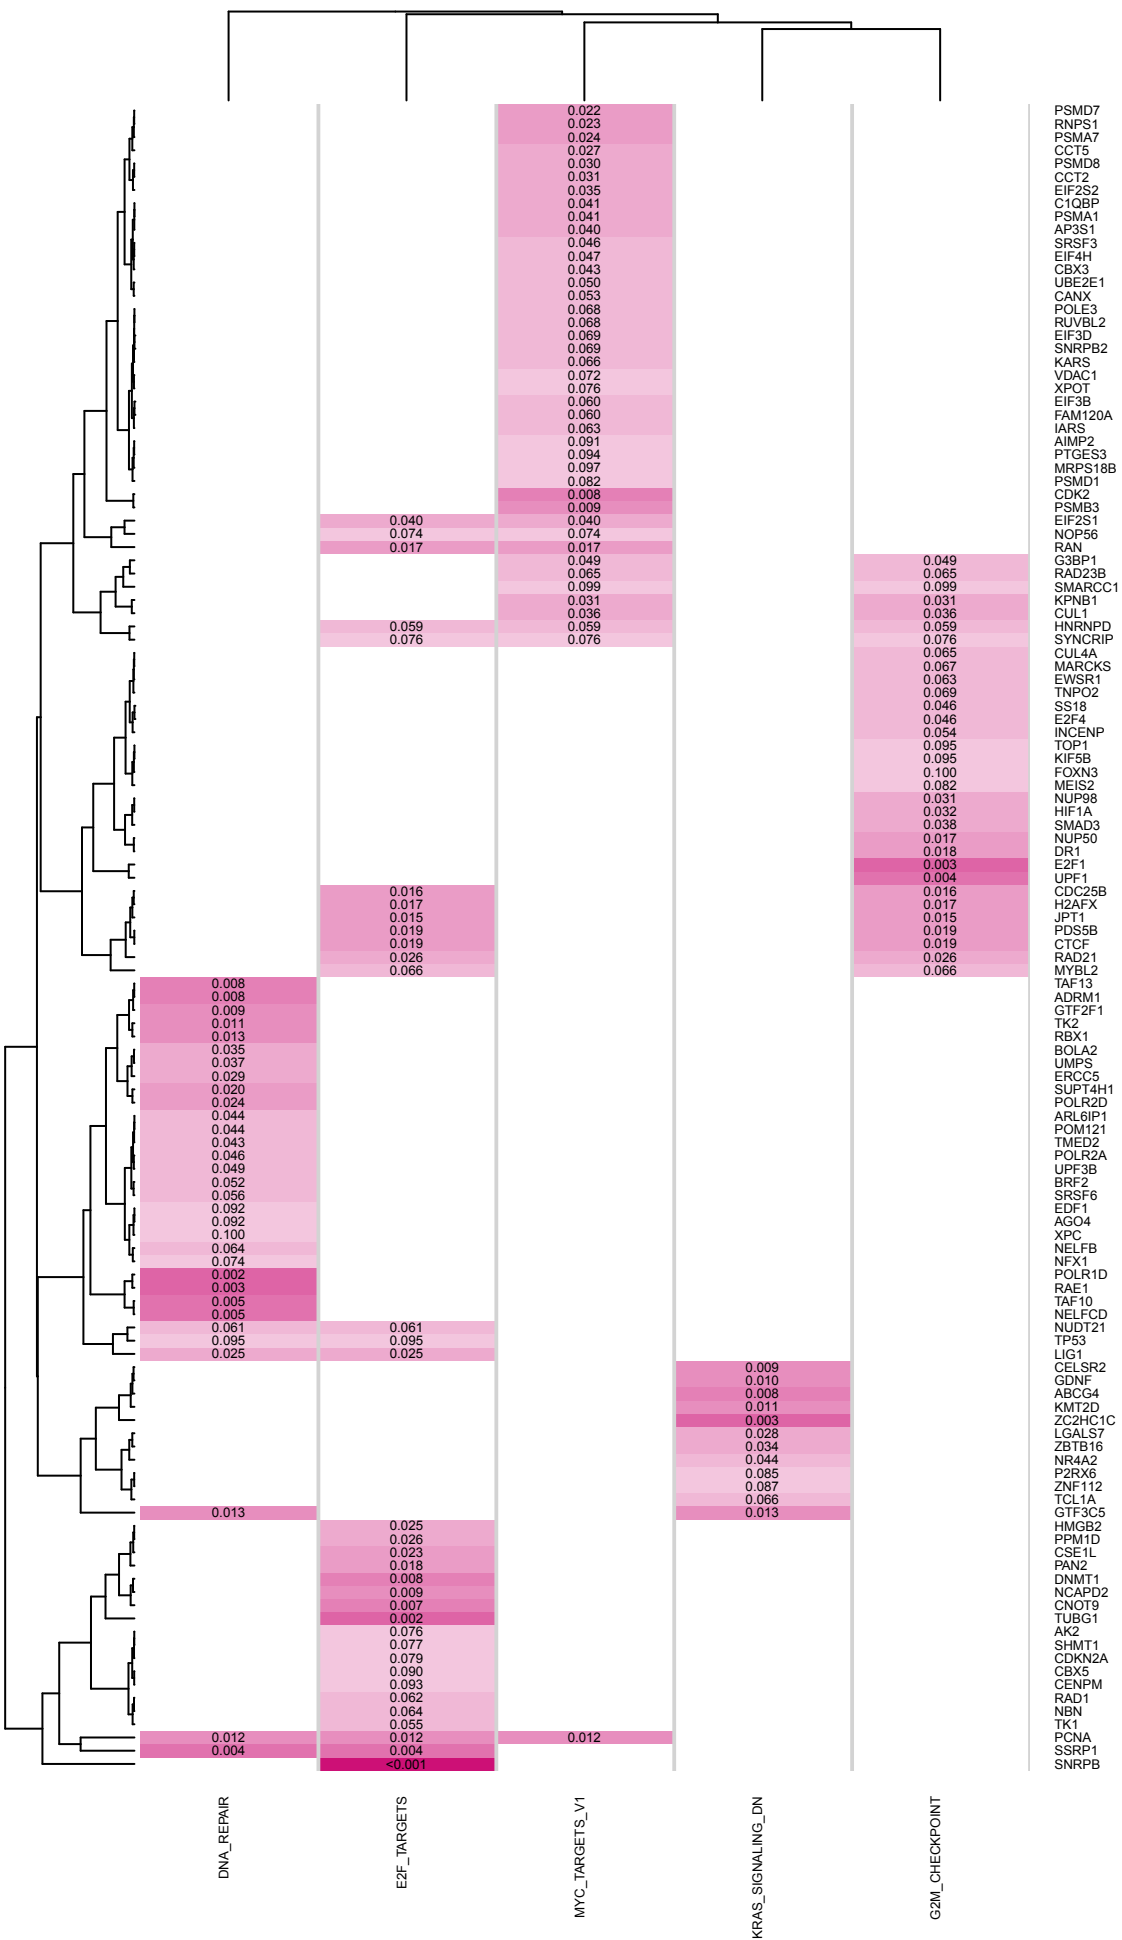

## B. Driver genes ( $p < 0.10$ ) in validated gene sets in estrogen receptor negative tumors

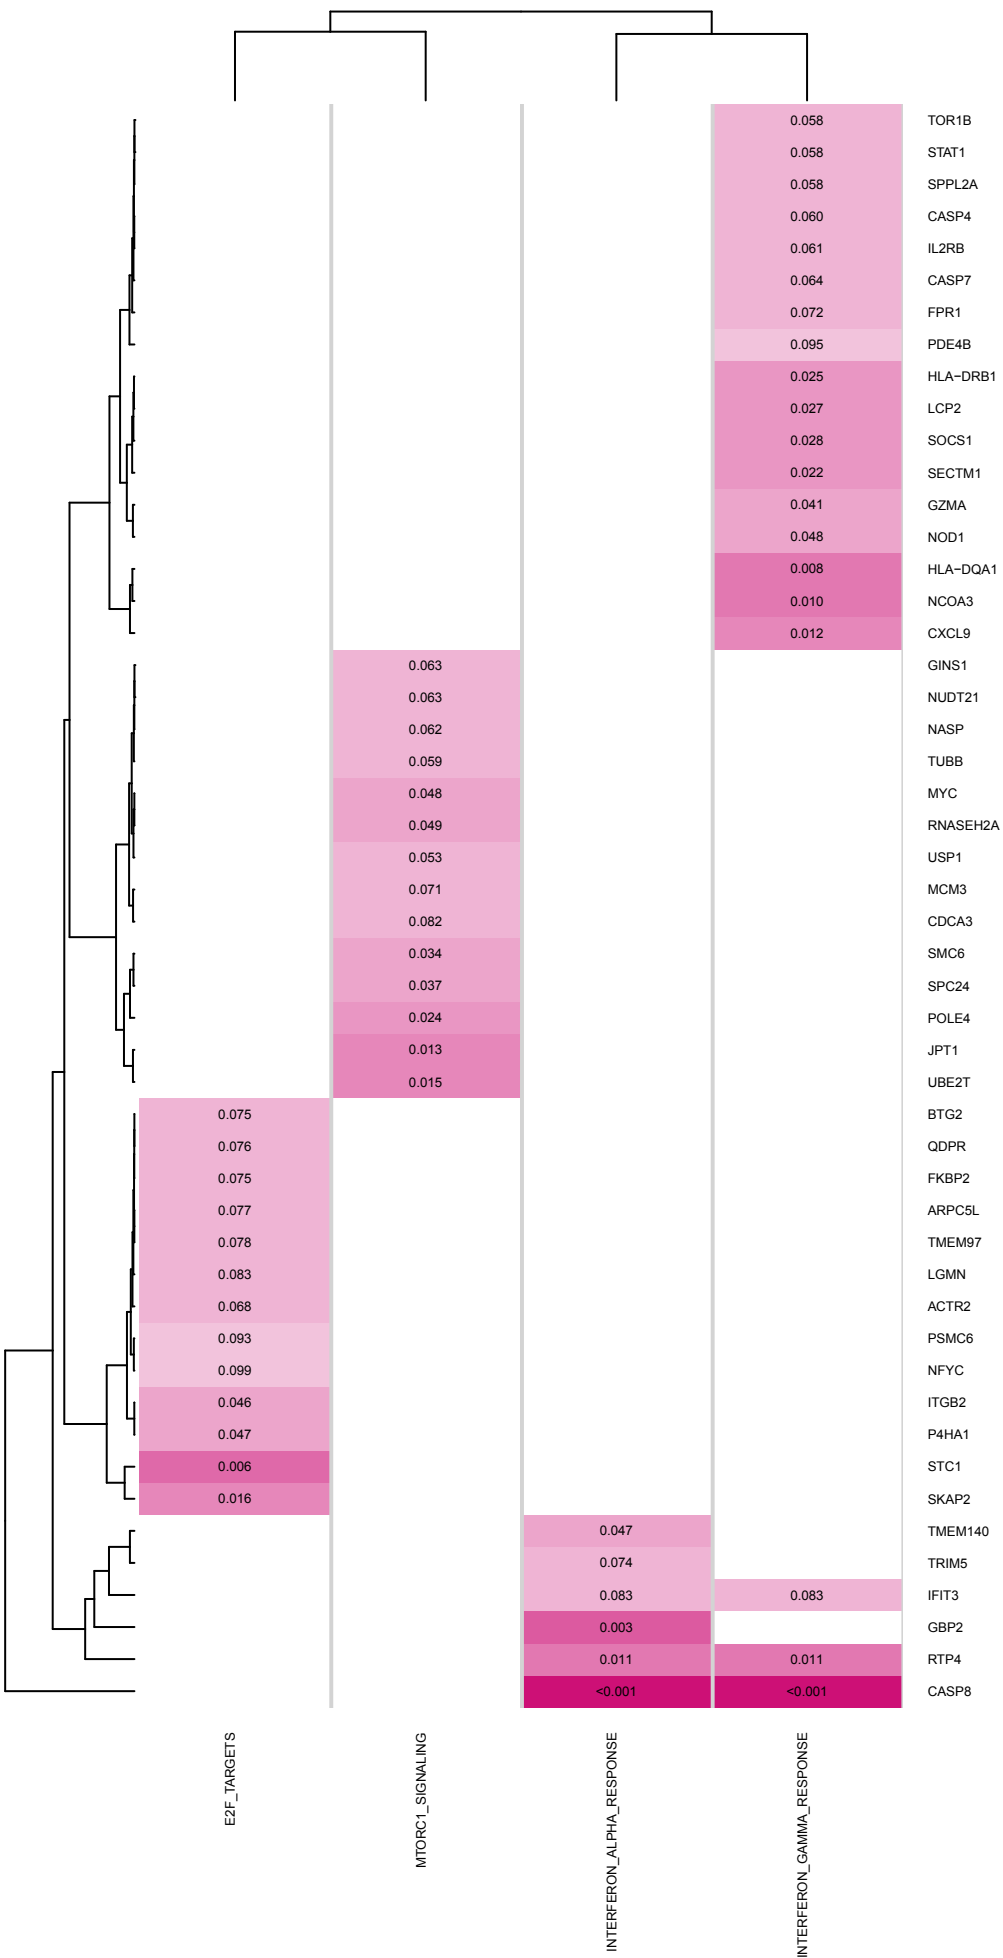

### C. Driver genes ( $p < 0.10$ ) in validated gene sets in estrogen receptor positive tumor-adjacent tissues

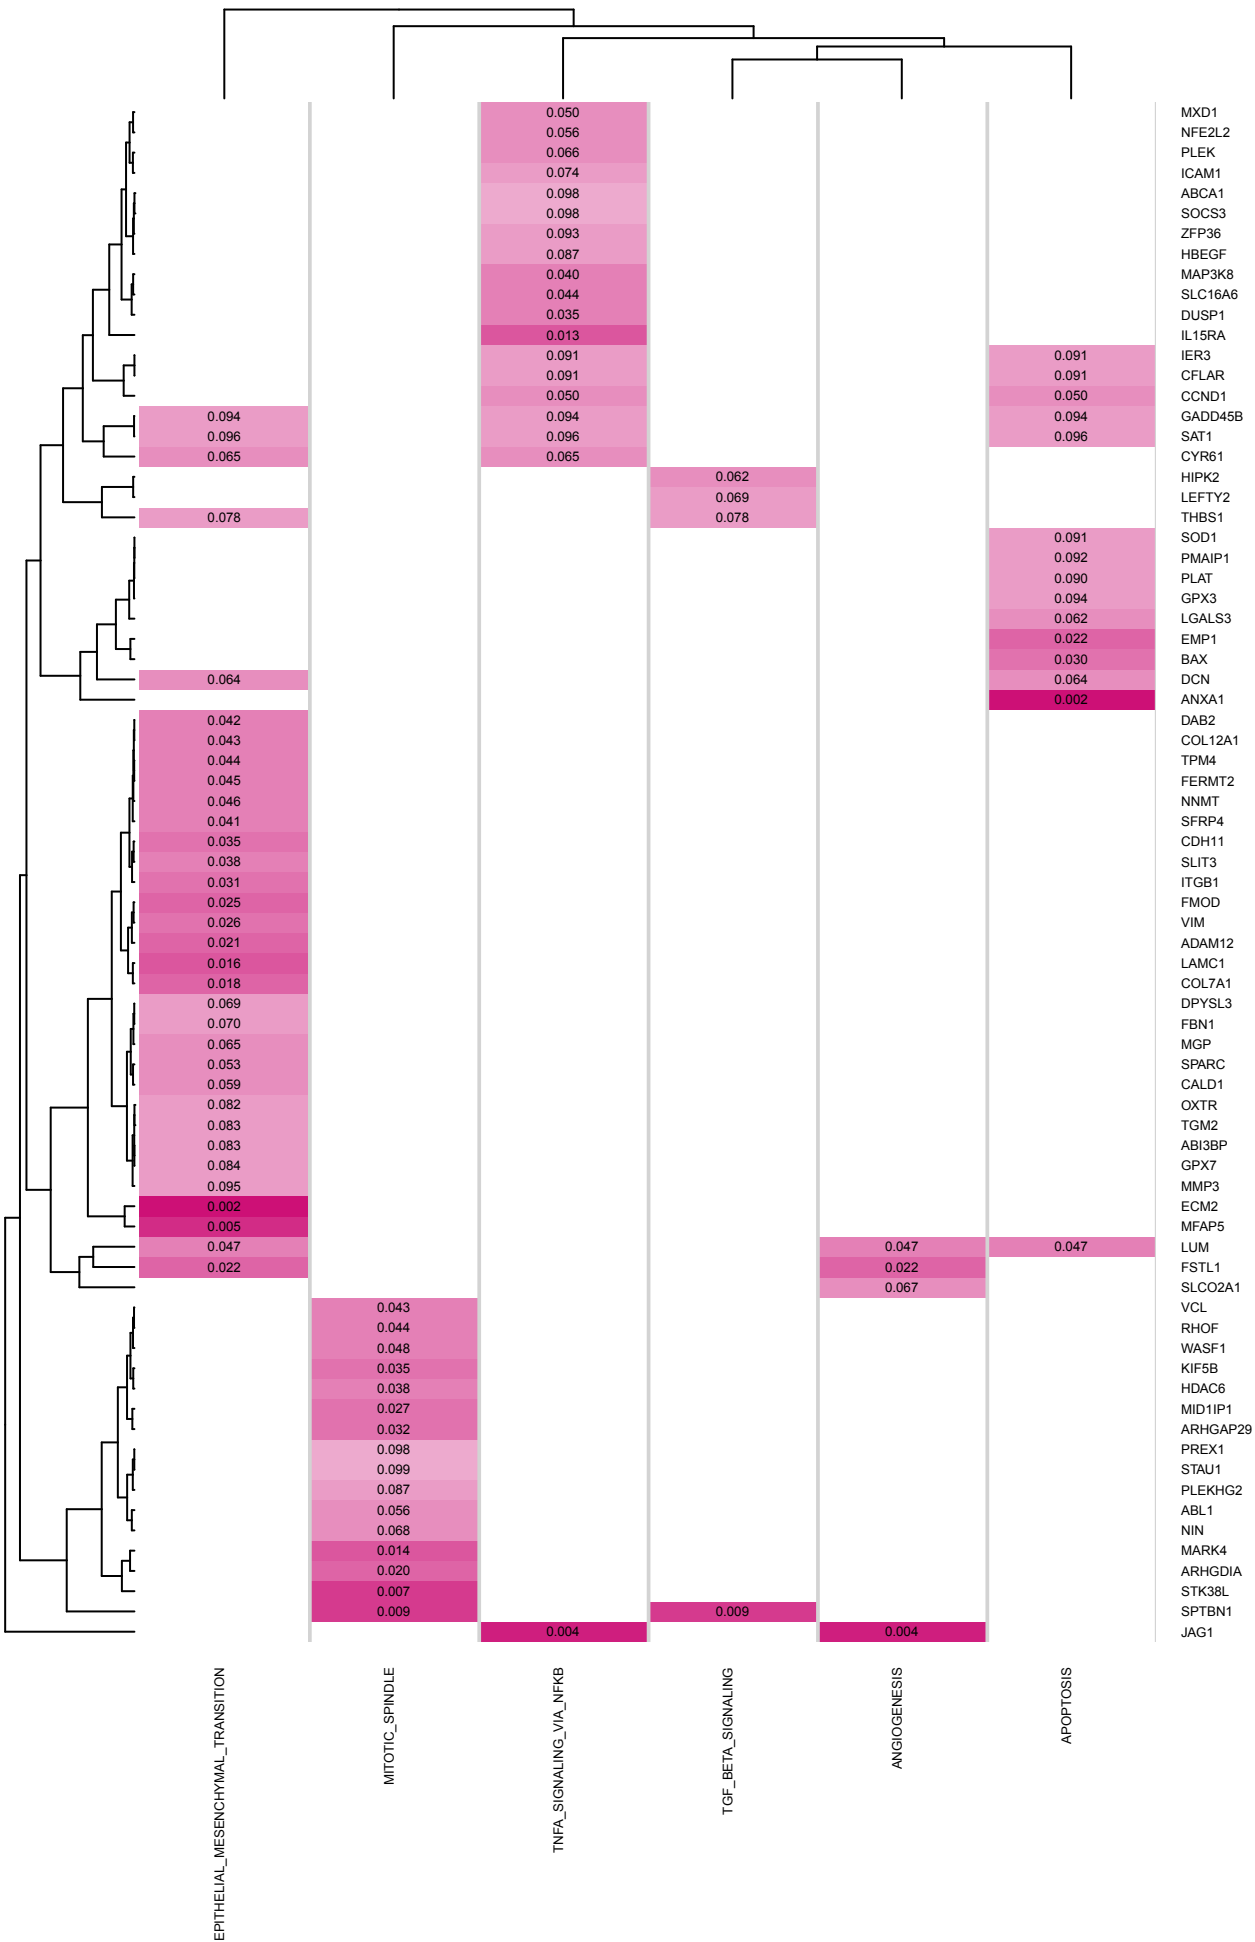

D. Driver genes ( $p < 0.10$ ) in validated gene sets in estrogen receptor negative tumor-adjacent tissues

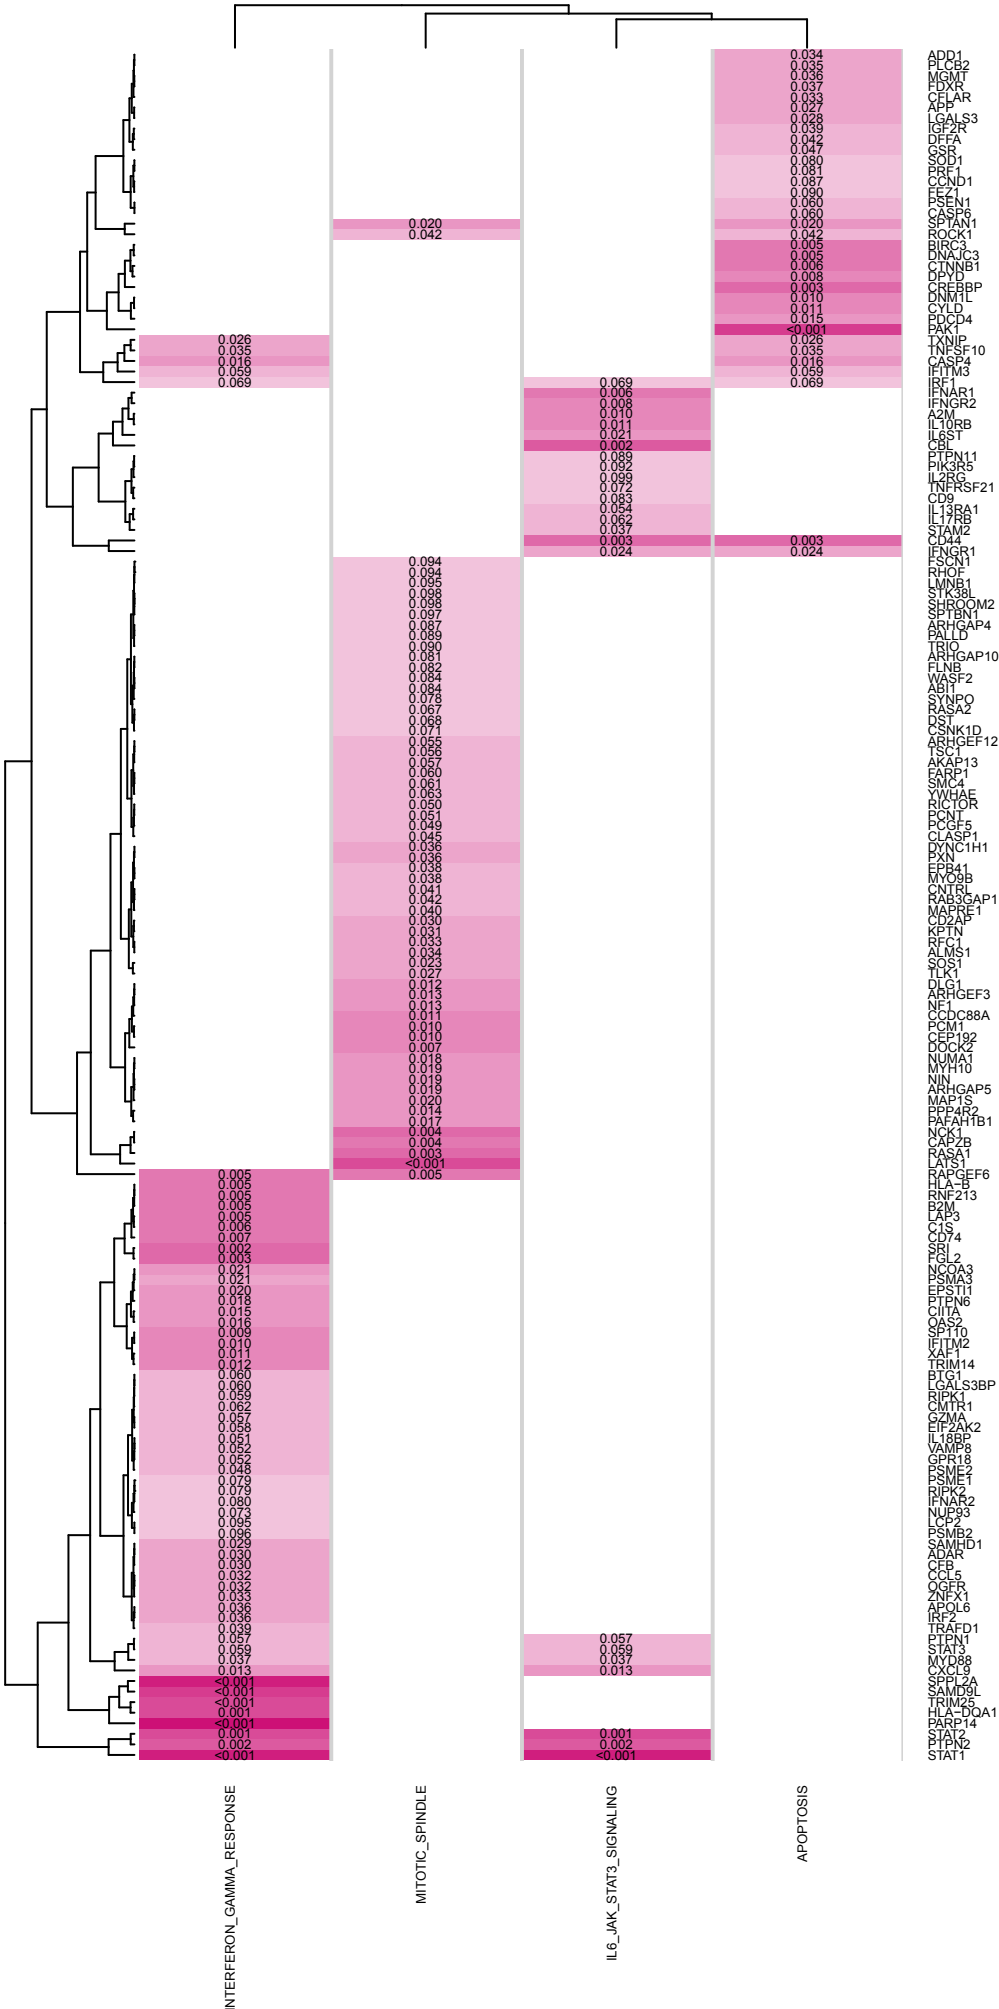

Supplement: NIHMS1511365-supplement-10549_2018_5034_MOESM3_ESM.pdf [file NIHMS1511365-supplement-10549_2018_5034_MOESM3_ESM.pdf]
